# Supplementary material for: Working from Home during the COVID-19 Pandemic and Its Effects on Diet, Sedentary Lifestyle, and Stress
Source: MDPI journal article supplement (doi:10.3390/nu14194006), 2022-09-27
Supplement: s1 [file s1]

## Supplementary Materials

**Table S1.** Changes in meal patterns after COVID-19 pandemic.

| <b>Meals</b>           | <b>Before COVID-19</b> |          | <b>During COVID-19</b> |          | <b>p-value</b> |
|------------------------|------------------------|----------|------------------------|----------|----------------|
|                        | <b>n</b>               | <b>%</b> | <b>n</b>               | <b>%</b> |                |
| Breakfast              | 264                    | 80.5     | 257                    | 78.4     | 0.473          |
| Snacking Before Midday | 242                    | 73.8     | 183                    | 55.8     | <b>0.000*</b>  |
| Lunch                  | 298                    | 90.9     | 299                    | 91.2     | 0.862          |
| Snacking After Midday  | 45                     | 13.7     | 77                     | 23.5     | <b>0.000*</b>  |
| Dinner                 | 114                    | 34.8     | 164                    | 50.0     | <b>0.000*</b>  |
| Snacking at Night      | 69                     | 21.0     | 128                    | 39.0     | <b>0.000*</b>  |

*\*  $p < 0.05$  Wilcoxon signed rank test*
